# Supplementary material for: Type I interferon underlies severe disease associated with Junín virus infection in mice
Source: eLife. 2020 May 26;9:e55352. doi: 10.7554/eLife.55352 (PMC7297529; doi:10.7554/eLife.55352)
Supplement: Figure 1—source data 1. [file elife-55352-fig1-data1.xlsx]

## Sheet: Survival
	Day	Sham-Infected	WT	hTfR1+/-	hTfR1+/+
	21	1	1				succumbed=0
	21	1	1				survived=1
	21	1	1
	21		1
	21		1
	21			1
	21			1
	14			0
	21			1
	21			1
	21			1
	13				0
	15				0
	15				0
	16				0
	13				0
	14				0
	21	1	1	1
	21	1	1	1
	21	1	1	1
	14				0
	16				0
	16				0

## Sheet: Weights
	Day Post-Infection	Sham-infected									WT									hTfR1 +/-									hTfR1 +/+
	0	0	0	0	0	0	0				0	0	0	0	0	0	0	0	0	0	0	0	0	0	0	0	0	0	0	0	0	0	0	0	0	0	0
	1	9.90099	9.09091	13.4831	1.8018	8.69565	6				-1.17647	5.22876	5.55556	9.00901	7.07965	8.33333	2.12766	-0.740741	-3.07692	0.714286	6.66667	0	8.88889	5.76923	-3.80952	-0.900901	-2.32558	-0.787402	0.775194	8.39161	7.14286	-1.90476	-0.961538	2.41935	4.58716	1.81818	-2.41935
	2	16.8317	14.1414	15.7303	10.8108	16.6667	10				0.588235	13.7255	13.5802	18.9189	15.9292	15.8333	5.67376	5.18519	3.84615	2.85714	12.5926	1.71429	20.7407	13.4615	-2.85714	7.20721	1.55039	7.08661	5.42636	13.2867	11.1111	-0.952381	1.92308	12.0968	15.5963	5.45455	3.22581
	3	26.7327	22.2222	23.5955	20.7207	18.1159	15				2.35294	21.5686	20.9877	27.027	21.2389	20	10.6383	12.5926	10	7.14286	16.2963	6.28571	22.963	24.0385	5.71429	17.1171	4.65116	8.66142	12.4031	18.8811	15.873	7.61905	13.4615	23.3871	22.0183	14.5455	9.67742
	4	27.7228	22.2222	26.9663	28.8288	21.0145	23				8.23529	30.0654	27.7778	33.3333	33.6283	27.5	17.0213	17.7778	14.6154	9.28571	22.963	6.28571	28.1481	33.6538	13.3333	27.027	6.20155	11.0236	19.3798	27.972	21.4286	13.3333	18.2692	23.3871	23.8532	24.5455	13.7097
	5	31.6832	25.2525	32.5843	36.9369	26.087	26				6.47059	33.9869	33.3333	45.045	46.9027	36.6667	22.695	22.963	20.7692	10	20.7407	5.14286	39.2593	43.2692	21.9048	38.7387	12.4031	15.748	25.5814	34.2657	23.8095	28.5714	34.6154	33.871	39.4495	33.6364	20.9677
	6	40.5941	31.3131	34.8315	48.6486	28.2609	31				5.88235	41.1765	37.6543	50.4505	52.2124	45	27.6596	26.6667	24.6154	11.4286	25.1852	5.14286	38.5185	49.0385	31.4286	49.5495	10.0775	13.3858	27.1318	40.5594	24.6032	29.5238	36.5385	30.6452	42.2018	40	16.129
	7	51.4851	36.3636	49.4382	55.8559	33.3333	38				7.64706	47.7124	42.5926	61.2613	60.177	57.5	33.3333	31.1111	29.2308	16.4286	27.4074	5.71429	43.7037	58.6538	36.1905	62.1622	15.5039	13.3858	37.9845	48.951	30.1587	34.2857	35.5769	33.871	39.4495	38.1818	16.129
	8	58.4158	35.3535	57.3034	57.6577	36.9565	40				8.23529	48.366	44.4444	71.1712	62.8319	60	36.1702	38.5185	36.9231	15.7143	36.2963	4	48.8889	48.0769	46.6667	66.6667	20.9302	22.0472	38.7597	39.1608	28.5714	35.2381	32.6923	29.0323	34.8624	38.1818	12.9032
	9	70.297	41.4141	66.2921	62.1622	40.5797	49				12.3529	55.5556	56.1728	71.1712	65.4867	66.6667	41.1348	41.4815	37.6923	20	40	5.71429	49.6296	41.3462	50.4762	73.8739	17.8295	14.1732	42.6357	34.965	28.5714	35.2381	33.6538	24.1935	34.8624	33.6364	8.06452
	10	75.2475	42.4242	71.9101	66.6667	41.3043	55				12.9412	60.7843	58.0247	75.6757	72.5664	68.3333	43.9716	43.7037	39.2308	20.7143	44.4444	1.71429	49.6296	33.6538	50.4762	90.0901	17.8295	16.5354	38.7597	28.6713	22.2222	32.381	25	12.0968	31.1927	23.6364	4.83871
	11	86.1386	48.4848	83.1461	78.3784	44.2029	65				14.7059	66.6667	66.0494	78.3784	76.9912	70	47.5177	45.1852	42.3077	21.4286	48.8889	5.14286	51.1111	36.5385	44.7619	109.009	17.8295	14.9606	35.6589	25.8741	20.6349	25.7143	21.1538	9.67742	21.1009	9.09091	2.41935
	12	96.0396	48.4848	91.0112	87.3874	44.9275	76				14.7059	69.9346	66.0494	83.7838	78.7611	72.5	53.1915	54.0741	47.6923	24.2857	52.5926	2.85714	51.8519	38.4615	44.7619	112.613	20.9302	17.3228	27.1318	11.1888	19.0476	23.8095	19.2308	6.45161	11.9266	0	-3.22581
	13	99.0099	48.4848	96.6292	93.6937	52.1739	84				17.6471	69.9346	63.5802	89.1892	81.4159	75	60.9929	55.5556	47.6923	24.2857	51.8519	4.57143	53.3333	41.3462	39.0476	112.613	23.2558	18.1102	18.6047	7.69231	15.873		6.73077	0.806452	7.33945		-7.25806
	14	105.941	50.5051	96.6292	99.0991	54.3478	84				17.6471	70.5882	64.1975	91.8919	83.1858	76.6667	59.5745	52.5926	46.1538	27.1429	57.7778	2.28571	54.8148	53.8462		116.216	20.9302	18.1102	8.52713	-4.1958	11.9048		-3.84615	-4.03226	-6.42202
	15	115.842	61.6162	107.865	105.405	55.0725	90				22.3529	71.2418	63.5802	95.4955	88.4956	73.3333	64.539	56.2963	53.8462	32.1429	58.5185	4	56.2963	60.5769		124.324	25.5814	21.2598		-5.59441	9.52381				-11.9266
	16	125.743	61.6162	115.73	111.712	61.5942	104				22.3529	71.2418	64.1975	102.703	95.5752	76.6667	65.9574	61.4815	56.1538	36.4286	57.7778	6.85714	54.0741	65.3846		128.829	27.907	24.4094		-6.99301	4.7619
	17	120.792	64.6465	119.101	113.514	66.6667	109				23.5294	67.9739	61.1111	108.108	101.77	83.3333	69.5035	68.1481	59.2308	33.5714	57.037	3.42857	58.5185	58.6538		129.73	29.4574	28.3465
	18	129.703	68.6869	124.719	119.82	72.4638	111				24.7059	68.6275	62.3457	121.622	110.619	84.1667	66.6667	71.1111	61.5385	40.7143	59.2593	7.42857	60.7407	63.4615		131.532	23.2558	28.3465
	19	129.703	68.6869	115.73	127.027	80.4348	118				25.8824	65.3595	62.3457	123.423	116.814	85.8333	73.0496	71.1111	62.3077	40.7143	57.7778	5.71429	60.7407	64.4231		124.324	31.7829	22.8346
	20	127.723	72.7273	125.843	128.829	81.8841	124				31.7647	65.3595	63.5802	131.532	116.814	89.1667	76.5957	76.2963	70	40.7143	55.5556	4.57143	61.4815	61.5385		125.225	33.3333	25.1969
	21	131.683	74.7475	128.09	131.532	87.6812	136				31.1765	63.3987	62.3457	132.432	121.239	94.1667	77.305	77.037	76.1538	45.7143	58.5185	6.85714	60.7407	53.8462		129.73	34.8837	29.1339
