# Supplementary material for: Type I interferon underlies severe disease associated with Junín virus infection in mice
Source: eLife. 2020 May 26;9:e55352. doi: 10.7554/eLife.55352 (PMC7297529; doi:10.7554/eLife.55352)
Supplement: Figure 2—source data 1. [file elife-55352-fig2-data1.xlsx]

## Sheet: Survival
	Days Post-Infection	Sham-infected	3-week-old	4-week-old	5-week-old	6-week-old
	13		0	0				succumbed=0
	12		0					survived=1
	12		0
	11		0
	12		0
	11		0
	28			1
	28			1
	28			1
	28	1		1	1	1
	28	1		1	1	1
	28	1			1	1

## Sheet: Weights
	Day Post-infection	Sham-infected 3-week-old						Sham-infected 4-week-old						Sham-infected 5-week-old						sham-infected 6-week-old						JUNV-infected 3-week-old						JUNV-infected 4-week-old						JUNV-infected 5-week-old						JUNV-infected 6-week-old
	0	0	0	0				0	0	0				0	0	0				0	0	0				0	0	0	0	0	0	0	0	0	0	0	0	0	0	0				0	0	0
	1	7.69231	5.66038	4.08163				-2.0979	1.26582	2.7027				11.9565	4.65116	0				-0.862069	5	0.446429				-2.06186	-0.990099	2.10526	-3.37079	3.26087	-2.08333	3.44828	1.88679	1.91083	1.21212	-1.27389	0	5.23256	2.31214	1.1236				-3.58744	-1.45631	-1.1583
	2	14.4231	13.2075	14.2857				2.7972	3.79747	4.05405				13.587	12.7907	3.08642				-0.862069	6	-0.446429				4.12371	2.9703	7.36842	8.98876	10.8696	4.16667	6.89655	6.91824	5.73248	3.0303	-0.636943	5.52147	6.39535	1.15607	6.74157				3.13901	0.970874	-2.3166
	3	21.1538	20.7547	23.4694				6.99301	6.32911	7.43243				9.23913	16.2791	1.23457				-1.2931	7.5	1.78571				10.3093	8.91089	11.5789	20.2247	21.7391	17.7083	11.0345	10.6918	8.9172	4.24242	3.82166	7.97546	4.65116	0.578035	8.98876				0.896861	3.8835	-2.7027
	4	28.8462	28.3019	33.6735				11.1888	12.6582	10.1351				9.78261	22.093	5.55556				0.862069	15	3.125				21.6495	21.7822	20	28.0899	31.5217	25	15.1724	13.8365	13.3758	9.09091	7.00637	16.5644	6.39535	4.62428	12.3596				0.896861	6.79612	1.1583
	5	34.6154	31.1321	42.8571				14.6853	12.0253	14.1892				11.9565	25	11.1111				1.72414	18	4.91071				25.7732	31.6832	30.5263	39.3258	39.1304	37.5	22.069	18.239	17.1975	14.5455	8.9172	20.8589	6.39535	8.09249	14.0449				1.34529	8.73786	0
	6	39.4231	34.9057	56.1224				17.4825	14.557	14.1892				7.6087	27.907	16.6667				-0.862069	20	5.80357				34.0206	39.604	25.2632	43.8202	41.3043	44.7917	24.8276	22.6415	17.8344	16.3636	5.09554	21.4724	5.81395	14.4509	14.0449				2.69058	4.85437	-0.3861
	7	47.1154	42.4528	69.3878				22.3776	18.3544	18.2432				10.8696	32.5581	16.6667				3.01724	22	4.46429				29.8969	38.6139	37.8947	44.9438	41.3043	46.875	28.9655	25.7862	24.2038	24.8485	10.1911	28.2209	11.6279	16.185	16.2921				5.38117	6.79612	2.3166
	8	53.8462	48.1132	79.5918				23.0769	19.6203	22.2973				13.0435	36.6279	20.3704				4.74138	24	4.91071				17.5258	35.6436	40	42.6966	36.9565	48.9583	28.9655	27.673	26.1146	25.4545	1.91083	19.0184	10.4651	13.8728	12.9213				5.8296	8.73786	2.3166
	9	57.6923	50.9434	87.7551				25.1748	21.519	23.6486				11.9565	38.9535	20.9877				6.03448	25	4.46429				12.3711	31.6832	36.8421	39.3258	30.4348	37.5	28.9655	30.1887	26.1146	27.2727	-3.18471	16.5644	5.81395	12.1387	12.3596				4.93274	9.70874	3.0888
	10	55.7692	53.7736	92.8571				30.0699	24.6835	25				13.587	40.1163	24.0741				6.46552	26	5.35714				7.21649	26.7327	34.7368	25.8427	27.1739	34.375	30.3448	25.7862	26.1146	20	-5.09554	12.2699	2.32558	13.8728	11.7978				6.72646	11.165	3.4749
	11	66.3462	62.2642	103.061				34.965	25.3165	27.027				16.3043	40.6977	27.1605				6.89655	25	5.80357				-4.12371	17.8218	25.2632		13.0435		31.7241	25.1572	27.3885	16.9697	-4.4586	11.6564	1.16279	13.2948	11.7978				7.62332	10.6796	3.4749
	12	73.0769	71.6981	112.245				40.5594	34.1772	33.7838				21.7391	44.186	29.6296				8.18966	26.5	6.69643				-25.7732						34.4828	32.0755	30.5732	20.6061	-2.54777	6.13497	-4.65116	10.9827	7.86517				6.27803	12.1359	1.5444
	13	76.9231	76.4151	117.347				46.1538	41.1392	39.1892				22.8261	44.7674	35.8025				10.3448	27	10.7143										37.931	32.7044	31.2102	19.3939	0.636943		-6.39535	7.51445	2.24719				6.27803	12.1359	2.3166
	14	79.8077	82.0755	119.388				48.2517	42.4051	41.8919				25.5435	45.3488	40.1235				12.069	28.5	11.1607										39.3103	35.8491	29.9363	18.7879	3.18471		-12.2093	3.46821	-2.80899				5.8296	12.6214	3.4749
	15	83.6538	84.9057	121.429				53.1469	46.2025	46.6216				27.1739	46.5116	44.4444				11.6379	29	11.6071										43.4483	34.5912	32.4841	18.1818	6.36943		-9.30233	-3.46821	-8.98876				5.38117	16.0194	3.861
	16	82.6923	87.7358	125.51				51.7483	46.8354	50.6757				28.2609	47.6744	44.4444				10.3448	28.5	12.5										44.1379	27.044	29.9363	18.1818	9.55414		-12.2093	-7.51445	-10.6742				3.13901	13.1068	1.9305
	17	88.4615	88.6792	134.694				58.7413	44.3038	62.1622				29.3478	48.8372	45.679				10.7759	29.5	11.6071										51.7241	32.7044	28.0255	28.4848	13.3758		-5.23256	-9.82659	-16.8539				4.03587	11.6505	0
	18	90.3846	92.4528	136.735				60.8392	44.9367	65.5405				30.9783	48.2558	47.5309				11.6379	29	12.5										57.2414	28.9308	32.4841	22.4242	8.9172		-9.88372	-11.5607	-17.4157				5.38117	11.6505	3.861
	19	91.3462	98.1132	138.776				62.2378	46.2025	66.8919				32.6087	49.4186	48.7654				10.7759	29.5	13.3929										60	32.0755	38.2166	26.0606	14.6497		-3.48837	-9.24855	-16.2921				9.86547	15.534	5.40541
	20	96.1538	104.717	142.857				63.6364	49.3671	68.2432				35.3261	51.7442	51.8519				11.6379	31	14.7321										62.069	31.4465	36.9427	24.2424	9.55414		-1.16279	-6.35838	-14.0449				7.62332	15.534	4.2471
	21	101.923	111.321	147.959				68.5315	51.8987	70.9459				36.413	53.4884	54.321				13.7931	31.5	16.0714										64.1379	34.5912	42.0382	27.2727	18.4713		2.32558	-6.35838	-10.6742				10.3139	17.4757	5.40541
	22	106.731	116.038	152.041				71.3287	55.6962	72.973				37.5	55.2326	56.7901				15.9483	32.5	16.5179										64.1379	33.9623	39.4904	28.4848	22.9299		3.48837	-5.20231	-9.55056				11.2108	18.932	6.17761
	23	110.577	116.981	154.082				72.7273	55.6962	71.6216				38.587	53.4884	56.1728				16.3793	33.5	16.5179										62.069	32.7044	36.9427	27.2727	21.6561		5.81395	-5.78035	-10.6742				10.7623	18.4466	5.79151
	24	114.423	118.868	153.061				75.5245	53.7975	72.973				39.6739	54.6512	58.0247				15.9483	34	17.8571										67.5862	34.5912	40.1274	32.7273	28.0255		9.30233	-2.31214	-8.42697				10.7623	17.9612	5.01931
	25	118.269	124.528	152.041				75.5245	55.0633	71.6216				40.7609	54.0698	58.642				16.8103	34	20.0893										66.8966	35.2201	40.7643	33.3333	33.758		8.13953	-2.89017	-7.30337				11.6592	17.4757	6.56371
	26	117.308	121.698	154.082				76.2238	56.3291	71.6216				42.9348	53.4884	59.2593				17.6724	33	20.0893										66.2069	35.8491	42.0382	33.9394	33.121		11.0465	1.7341	-7.30337				13.0045	19.9029	6.17761
	27	119.231	125.472	150				76.2238	53.7975	73.6486				44.5652	59.8837	57.4074				18.9655	29.5	19.1964										62.069	37.7358	35.6688	27.2727	26.7516		8.13953	2.89017	-8.98876				14.3498	20.3883	5.79151
	28	118.269	124.528	148.98				77.6224	51.8987	72.2973				45.1087	49.4186	54.9383				19.3966	30.5	18.3036										66.2069	33.9623	35.6688	33.3333	31.2102		13.3721	1.7341	-8.98876				12.5561	21.3592	6.56371

## Sheet: Clinical Scores
	Day Post-infection	3-week						4-week						5-week						6-week
	0	0	0	0	0	0			0	0	0	0	0	0	0	0				0	0	0
	1	0	0	0	0	0			0	0	0	0	0	0	0	0				0	0	0
	2	0	0	0	0	0			0	0	0	0	0	0	0	0				0	0	0
	3	0	0	0	0	0			0	0	0	0	0	0	0	0				0	0	0
	4	0	0	0	0	0			0	0	0	0	0	0	0	0				0	0	0
	5	0	0	0	0	0			0	0	0	0	0	0	0	0				0	0	0
	6	0	0	0	0	0			0	0	0	0	0	0	0	0				0	0	0
	7	1	1	0	0	0			0	0	0	0	0	0	0	0				0	0	0
	8	4	2	1	0	0			0	0	0	2	1	1	0	0				0	0	0
	9	5	4	2	4	4			0	0	0	4	4	2	0	0				0	0	0
	10	6	5	4	5	5			2	1	2	4	5	3	1	0				0	0	0
	11	6	5	5	5				2	1	4	4	5	5	2	2				0	0	0
	12	7							1	0	2	3	6	4	3	4				0	0	0
	13								0	0	2	1		4	4	4				0	0	0
	14								0	0	3	1		2	5	4				0	0	0
	15								0	0	1	1		4	5	4				0	0	0
	16								0	0	0	1		5	5	4				0	0	0
	17								0	0	0	0		5	5	4				0	0	0
	18								0	0	0	0		4	5	4				0	0	0
	19								0	0	0	0		4	4	4				0	0	0
	20								0	0	0	0		2	4	2				0	0	0
	21								0	0	0	0		0	1	1				0	0	0
	22								0	0	0	0		0	1	0				0	0	0
	23								0	0	0	0		0	0	0				0	0	0
	24								0	0	0	0		0	0	0				0	0	0
	25								0	0	0	0		0	0	0				0	0	0
	26								0	0	0	0		0	0	0				0	0	0
	27								0	0	0	0		0	0	0				0	0	0
	28								0	0	0	0		0	0	0				0	0	0
