# Supplementary material for: Type I interferon underlies severe disease associated with Junín virus infection in mice
Source: eLife. 2020 May 26;9:e55352. doi: 10.7554/eLife.55352 (PMC7297529; doi:10.7554/eLife.55352)
Supplement: Figure 3—source data 1. [file elife-55352-fig3-data1.xlsx]

## Sheet: Survival
	Day	Sham-infected	105 PFU	104 PFU	103 PFU
	28	1					succumbed=0
	28	1					survived=1
	28	1
	13		0
	11		0
	12		0
	13			0
	15			0
	13			0
	13				0
	28				1
	14				0
	14		0
	15		0
	13		0
	13		0
	17			0
	18			0
	14			0
	16			0
	13				0
	28				1
	14				0
	19				0

## Sheet: Weights
	Day Post-Infection	Sham-infected							105 CCID50 JUNV							104 CCID50 JUNV							103 CCID50 JUNV
	0	0	0	0	0	0	0		0	0	0	0	0	0	0	0	0	0	0	0	0	0	0	0	0	0	0	0	0
	1	8.91089	5.26316	8.79121	9.90991	6.25	2.94118		0	1.92308	9.27835	9.47368	-6.93069	-3.37079	1.08696	-2.1978	-4.44444	-4.08163	-3.125	-6.74157	6.93069	0.917431	14.7727	6.45161	3.26087	6.59341	0	12.7451	0
	2	17.8218	13.6842	19.7802	18.9189	16.6667	10.7843		7.21649	7.69231	16.4948	13.6842	1.9802	5.61798	7.6087	23.0769	8.88889	8.16327	12.5	1.1236	14.8515	4.58716	26.1364	15.0538	-8.69565	17.5824	4.0404	18.6275	9.7561
	3	20.7921	20	28.5714	26.1261	20.8333	12.7451		14.433	12.5	17.5258	21.0526	7.92079	15.7303	8.69565	28.5714	16.6667	16.3265	19.7917	10.1124	20.7921	8.25688	34.0909	25.8065	-3.26087	23.0769	7.07071	22.549	15.8537
	4	32.6733	31.5789	39.5604	36.036	31.25	20.5882		22.6804	16.3462	26.8041	24.2105	10.8911	20.2247	15.2174	26.3736	22.2222	22.449	25	15.7303	23.7624	11.9266	37.5	25.8065	3.26087	26.3736	12.1212	29.4118	24.3902
	5	41.5842	38.9474	50.5495	42.3423	40.625	24.5098		26.8041	25.9615	35.0515	35.7895	16.8317	23.5955	22.8261	36.2637	32.2222	31.6327	35.4167	25.8427	31.6832	19.2661	47.7273	34.4086	8.69565	37.3626	15.1515	33.3333	32.9268
	6	53.4653	43.1579	57.1429	53.1532	47.9167	34.3137		30.9278	31.7308	45.3608	44.2105	25.7426	26.9663	22.8261	46.1538	38.8889	40.8163	45.8333	26.9663	37.6238	24.7706	59.0909	40.8602	17.3913	42.8571	19.1919	37.2549	41.4634
	7	65.3465	50.5263	61.5385	61.2613	54.1667	43.1373		40.2062	36.5385	50.5155	50.5263	31.6832	32.5843	17.3913	46.1538	41.1111	44.898	50	35.9551	41.5842	31.1927	56.8182	44.086	21.7391	52.7473	25.2525	45.098	46.3415
	8	67.3267	60	68.1319	71.1712	59.375	52.9412		44.3299	37.5	51.5464	52.6316	30.6931	19.1011	7.6087	50.5495	47.7778	48.9796	59.375	37.0787	46.5347	37.6147	62.5	49.4624	22.8261	59.3407	28.2828	51.9608	53.6585
	9	69.3069	69.4737	80.2198	75.6757	63.5417	64.7059		42.268	30.7692	54.6392	50.5263	22.7723	7.86517	7.6087	57.1429	45.5556	50	62.5	32.5843	38.6139	34.8624	60.2273	56.9892	14.1304	60.4396	32.3232	55.8824	56.0976
	10	72.2772	82.1053	83.5165	83.7838	72.9167	71.5686		43.299	26.9231	51.5464	42.1053	24.7525	-2.24719	-3.26087	40.6593	44.4444	44.898	54.1667	25.8427	34.6535	32.1101	61.3636	61.2903	10.8696	45.0549	35.3535	58.8235	59.7561
	11	81.1881	90.5263	85.7143	89.1892	78.125	82.3529		35.0515	26.9231	48.4536	51.5789	7.92079		-15.2174	35.1648	47.7778	34.6939	50	22.4719	26.7327	29.3578	55.6818	60.2151	10.8696	38.4615	30.303	64.7059	59.7561
	12	83.1683	95.7895	93.4066	99.0991	85.4167	91.1765		30.9278	18.2692	42.268	38.9474	1.9802			21.978	45.5556	17.3469	42.7083	14.6067	23.7624	22.0183	44.3182	62.3656	2.17391	27.4725	28.2828	61.7647	56.0976
	13	85.1485	100	102.198	106.306	92.7083	96.0784		24.7423	19.2308						12.0879	48.8889	11.2245	31.25		13.8614			54.8387	5.43478	18.6813		64.7059	59.7561
	14	84.1584	104.211	105.495	113.514	96.875	99.0196			5.76923						8.79121	45.5556		28.125		9.90099			49.4624		15.3846		51.9608	52.439
	15	93.0693	110.526	112.088	116.216	103.125	102.941									13.1868	43.3333		25					51.6129		10.989		36.2745	40.2439
	16	97.0297	118.947	116.484	111.712	108.333	109.804									15.3846	42.2222							60.2151		14.2857		35.2941
	17	98.0198	124.211	123.077	123.423	118.75	119.608										31.1111							70.9677		7.69231		31.3725
	18	96.0396	127.368	130.769	124.324	123.958	124.51																	80.6452		2.1978		31.3725
	19	101.98	126.316	139.56	122.523	126.042	125.49																	86.0215				33.3333
	20	101.98	128.421	143.956	122.523	130.208	129.412																	88.172				33.3333
	21	104.95	130.526	159.341	127.928	139.583	136.275																	93.5484				44.1176
	22	103.96	129.474	159.341	128.829	143.75	137.255																	94.6237				45.098
	23	110.891	132.632	161.538	129.73	143.75	140.196																	104.301				46.0784
	24	107.921	133.684	160.44	129.73	146.875	143.137																	104.301				60.7843
	25	108.911	137.895	163.736	134.234	148.958	144.118																	104.301				62.7451
	26	104.95	135.789	164.835	136.036	151.042	141.176																	110.753				65.6863
	27	107.921	140	168.132	132.432	153.125	144.118																	112.903				71.5686
	28	106.931	138.947	170.33	131.532	151.042	145.098																	119.355				82.3529

## Sheet: Clinical Scores
	Day Post-infection	105 CCID50 JUNV							104 CCID50 JUNV							103 CCID50 JUNV							Sham-infected
	0	0	0	0	0	0	0	0	0	0	0	0	0	0	0	0	0	0	0	0	0	0	0	0	0
	1	0	0	0	0	0	0	0	0	0	0	0	0	0	0	0	0	0	0	0	0	0	0	0	0
	2	0	0	0	0	0	0	0	0	0	0	0	0	0	0	0	0	0	0	0	0	0	0	0	0
	3	0	0	0	0	0	0	0	0	0	0	0	0	0	0	0	0	0	0	0	0	0	0	0	0
	4	0	0	0	0	0	0	0	0	0	0	0	0	0	0	0	0	0	0	0	0	0	0	0	0
	5	0	0	0	0	0	0	0	0	0	0	0	0	0	0	0	0	0	0	0	0	0	0	0	0
	6	0	0	0	0	0	0	0	0	0	0	0	0	0	0	0	0	0	0	0	0	0	0	0	0
	7	0	1	1	0	0	0	0	0	0	0	0	0	0	0	0	0	0	0	0	0	0	0	0	0
	8	1	4	4	0	1	0	0	0	0	0	0	0	0	0	0	0	0	0	0	0	0	0	0	0
	9	4	4	4	1	1	0	2	1	2	3	0	0	0	0	0	0	0	0	0	2	0	0	0	0
	10	4	5	5	1	3	1	3	3	3	3	3	2	2	1	0	0	0	0	0	5	3	0	0	0
	11	5		5	2	3	2	3	5	5	4	4	2	3	2	3	0	2	1	0	5	4	0	0	0
	12	5			3	4	4	5	5	5	5	4	2	5	3	3	1	3	4	1	5	5	0	0	0
	13				4	4				5		6	2	5	4		1	4		2	5	5	0	0	0
	14					4				4		6	4		4		4			5		4	0	0	0
	15											6	4		4		5			4		5	0	0	0
	16											6	5				6			3		5	0	0	0
	17												5				6			1		5	0	0	0
	18																6			0		5	0	0	0
	19																5			0			0	0	0
	20																4			0			0	0	0
	21																3			0			0	0	0
	22																1			0			0	0	0
	23																1			0			0	0	0
	24																0			0			0	0	0
	25																0			0			0	0	0
	26																0			0			0	0	0
	27																0			0			0	0	0
	28																0			0			0	0	0
