# Supplementary material for: Type I interferon underlies severe disease associated with Junín virus infection in mice
Source: eLife. 2020 May 26;9:e55352. doi: 10.7554/eLife.55352 (PMC7297529; doi:10.7554/eLife.55352)
Supplement: Figure 4—source data 1. [file elife-55352-fig4-data1.xlsx]

## Sheet: Weights
			Infected																																			Sham-Infected
	0	0	0	0	0	0	0	0	0	0	0	0	0	0	0	0	0	0	0	0	0	0	0	0	0	0	0	0	0	0								0	0	0	0
	1	1	14.4144	19.4175	2.54237	16.2162	2.47934	6.38298	6.45161	11.9658	3.30579	-1.5625	3.4188	22.1239	-7.77778	0	2.67857	5.83333	-2.38095	13.3333	1.92308	-6.94444	6.59341	6.66667	-8.53659	-4.49438	4.93827	8.92857	9.67742	-2.29885								7.61905	3.36134	0.862069	6.89655
	2	2	20.7207	28.1553	15.2542	21.6216	14.0496	14.8936	12.0968	23.9316	12.3967	4.6875	8.54701	31.8584	2.22222	12.766	10.7143	18.3333	3.57143	18.8889	7.69231	6.94444	16.4835	20	3.65854	11.236	14.8148	14.2857	24.1935	9.1954								17.1429	10.084	9.48276	12.069
	3	3					17.3554	20.2128	18.5484	30.7692	19.8347	3.90625	13.6752	37.1681	16.6667	20.2128	18.75	26.6667	10.7143	27.7778	10.5769	16.6667	23.0769	25.5556	10.9756	13.4831	20.9877	18.75	38.7097	16.092									10.084	6.89655	19.8276
	4	4					19.8347	23.4043	23.3871	38.4615	25.6198	5.46875	17.094	43.3628	13.3333	23.4043	25	30.8333	22.619	33.3333	17.3077	34.7222	31.8681	33.3333	24.3902	20.2247	28.3951	25	50	21.8391									12.605	10.3448	23.2759
	5	5									32.2314	9.375	21.3675	48.6726	18.8889	29.7872	33.0357	37.5	25	43.3333	24.0385	44.4444	42.8571	41.1111	30.4878	25.8427	35.8025	37.5	62.9032	29.8851									21.0084	15.5172	31.0345
	6	6									37.1901	13.2812	27.3504	52.2124	25.5556	35.1064	39.2857	40.8333	36.9048	52.2222	30.7692	54.1667	50.5495	50	37.8049	33.7079	44.4444	44.6429	69.3548	37.931									25.2101	19.8276	37.931
	7	7													31.1111	38.2979	49.1071	45	42.8571	64.4444	34.6154	55.5556	63.7363	61.1111	46.3415	40.4494	55.5556	50	75.8065	44.8276										22.4138	43.1034
	8	8													37.7778	40.4255	52.6786	44.1667	51.1905	68.8889	38.4615	48.6111	68.1319	66.6667	46.3415	51.6854	61.7284	54.4643	59.6774	58.6207										26.7241	50
	9	9																	63.0952	78.8889	38.4615	36.1111	72.5275	61.1111	42.6829	48.3146	59.2593	54.4643	54.8387	63.2184										31.8966	49.1379
	10	10																	57.1429	68.8889	31.7308	25	71.4286	57.7778		42.6966	51.8519	46.4286	46.7742	57.4713										37.069	55.1724
	11	11																					57.1429	51.1111			48.1481	44.6429		52.8736											58.6207
	12	12																									39.5062	37.5													61.2069

## Sheet: Clinical Scores
		Infected																Sham-Infected
	0	0	0	0	0	0	0	0	0	0	0	0	0	0	0	0	0	0	0	0	0	0	0	0	0	0	0	0	0	0	0	0	0
	1	0	0	0	0	0	0	0	0	0	0	0	0	0	0	0	0	0	0	0	0	0	0	0	0	0	0	0	0	0	0	0	0
	2	0	0	0	0	0	0	0	0	0	0	0	0	0	0	0	0	0	0	0	0	0	0	0	0	0	0	0	0	0	0	0	0
	3	0	0	0	0	0	0	0	0	0	0	0	0	0	0	0	0	0	0	0	0	0	0	0	0	0	0	0	0	0	0	0	0
	4	0	0	0	0	0	0	0	0	0	0	0	0	0	0	0	0	0	0	0	0	0	0	0	0	0	0	0	0	0	0	0	0
	5	0	0	0	0	0	0	0	0	0	0	0	0	0	0	0	0	0	0	0	0	0	0	0	0	0	0	0	0	0	0	0	0
	6	0	0	0	0	0	0	0	0	0	0	0	0	0	0	0	0	0	0	0	0	0	0	0	0	0	0	0	0	0	0	0	0
	7	0	0	0	0	0	0	0	0	0	0	0	0	0	0	0	0	0	0	0	0	0	0	0	0	0	0	0	0	0	0	0	0
	8	0	0	0	0	0	0	0	0	0	0	1	0	0	0	1	0	0	0	0	0	0	0	0	0	0	0	0	0	0	0	0	0
	9	0	1	1	3	0	2	2	2	1	2	4	1	2	1	2	3	0	0	0	0	0	0	0	0	0	0	0	0	0	0	0	0
	10	3	4	3	5	3	4		4	4	3	4	4	3	4	4	3	0	0	0	0	0	0	0	0	0	0	0	0	0	0	0	0
	11					4	6			5	4		4	4	4	5	4	0	0	0	0	0	0	0	0	0	0	0	0	0	0	0	0
	12									6	6							0	0	0	0	0	0	0	0	0	0	0	0	0	0	0	0

## Sheet: IFN-alpha
	2	4	6	8	10	12	SI
	3.65448	8.58326	4.20342	10.3924	169.443	218.575	0.349047
	1.78732	9.41902	7.31143	59.7768	167.95	220.915	0.019575
	0.549047	6.36845	17.0742	133.185	215.304		0.3
	0.719575	12.4357	3.95906	118.447	127.04

## Sheet: Titers
		Liver				Spleen				Brain				Heart				Lung				Kidney				Intestine				Serum
	2	2.3	2.3	2.3	2.3	2.3	2.3	2.3	2.3	2.3	2.3	2.3	2.3	2.3	2.3	2.3	2.3	2.3	2.3	2.3	2.3	2.3	2.3	2.3	2.3	2.3	2.3	2.3	2.3	2.3	2.3	2.3	2.3
	4	2.3	2.3	2.3	2.3	2.3	2.3	2.3	2.3	2.3	2.3	2.3	2.3	2.3	2.3	2.3	2.3	2.3	2.3	2.3	2.3	2.3	2.3	2.3	2.3	2.3	2.3	2.3	2.3	2.3	2.3	2.3	2.3
	6	2.3	2.3	4.97	3.97	2.3	2.3	5.3	4.8	2.3	2.3	2.3	4.8	2.3	2.3	2.3	2.3	2.3	2.3	2.3	2.3	2.3	2.3	2.3	2.3	2.3	2.3	2.3	2.3	2.3	2.3	2.3	2.3
	8	4.8	4.3	5.3	3.97	4.3	5.8	4.75	4.85	5.63	2.3	4.8	5.8	2.3	2.3	2.3	2.3	2.3	2.3	2.3	2.3	2.3	2.3	5.8	5.63	2.3	3.63	2.3	2.3	2.3	2.3	2.3	2.3
	10	5.63	5.75	5.3	5.85	4.3	4.8	5.63	4.63	5.58	6.3	7.63	5.68	2.3	2.3	2.3	2.3	2.3	2.3	4.8	2.3	2.3	5.8	5.3	2.3	2.3	2.3	2.3	2.3	2.3	3.6	3.8	3.3
	12	5.3	4.97			3.97	4.97			7.3	8.3			3.63	4.63			3.3	5.3			4.97	5.97			3.58	3.68			4.3	4.8
