# Supplementary material for: Type I interferon underlies severe disease associated with Junín virus infection in mice
Source: eLife. 2020 May 26;9:e55352. doi: 10.7554/eLife.55352 (PMC7297529; doi:10.7554/eLife.55352)
Supplement: Figure 7—source data 1. [file elife-55352-fig7-data1.xlsx]

## Sheet: Survival
		Sham-infected	Wild-type	IFN-α/βR-/-	IFN-α/βγR-/-	hTfR1+/+	hTfR1+/+ × IFN-α/βR-/-	hTfR1+/+ × IFN-α/βγR-/-
	10					0					succumbed=0
	11					0					survived=1
	13					0
	28	1	1	1	1		1	1
	28	1	1	1	1		1	1
	28	1	1	1	1		1	1

## Sheet: Weights
	Day Post-infection	Sham-infected			Wild-Type			Type I IFN Receptor-/-			Type I and II IFN Receptor-/-			hTfR1+/+			hTfR1+/+× Type I IFN Receptor-/-			hTfR1+/+× Type I and II IFN Receptor-/-
	0	0	0	0	0	0	0	0	0	0	0	0	0	0	0	0	0	0	0	0	0	0
	1	4.62963	-2.91262	7.14286	9.00901	15	-0.892857	12.037	10.3774	7.62712	9.32203	10.5263	5.66038	3.15789	1.86916	0.952381	5.20833	4.8	6.60377	5.21739	2.91262	1.78571
	2	14.8148	9.70874	20.4082	15.3153	18	9.82143	21.2963	17.9245	13.5593	13.5593	14.9123	11.3208	11.5789	7.47664	8.57143	15.625	7.2	15.0943	6.95652	10.6796	8.03571
	3	18.5185	16.5049	27.551	18.9189	24	6.25	29.6296	24.5283	19.4915	18.6441	20.1754	17.9245	18.9474	10.2804	14.2857	23.9583	12	21.6981	10.4348	16.5049	15.1786
	4	23.1481	30.0971	32.6531	31.5315	39	10.7143	39.8148	32.0755	28.8136	30.5085	29.8246	23.5849	25.2632	15.8879	20	32.2917	18.4	27.3585	17.3913	27.1845	25
	5	29.6296	36.8932	42.8571	42.3423	42	15.1786	40.7407	44.3396	34.7458	33.0508	35.0877	31.1321	32.6316	20.5607	22.8571	39.5833	21.6	33.0189	23.4783	31.068	32.1429
	6	32.4074	47.5728	50	45.045	48	21.4286	53.7037	46.2264	37.2881	36.4407	39.4737	35.8491	37.8947	22.4299	28.5714	46.875	28.8	36.7925	27.8261	32.0388	40.1786
	7	39.8148	58.2524	62.2449	53.1532	59	31.25	61.1111	50	44.0678	41.5254	43.8596	44.3396	37.8947	31.7757	31.4286	58.3333	40	48.1132	31.3043	37.8641	48.2143
	8	44.4444	67.9612	68.3673	63.0631	69	33.9286	69.4444	52.8302	55.0847	51.6949	54.386	54.717	35.7895	33.6449	30.4762	66.6667	48	55.6604	40.8696	48.5437	51.7857
	9	51.8519	74.7573	75.5102	66.6667	76	41.9643	71.2963	57.5472	56.7797	60.1695	59.6491	59.434	34.7368	25.2336	29.5238	71.875	52.8	62.2642	46.087	52.4272	56.25
	10	50	83.4951	76.5306	72.0721	83	49.1071	77.7778	62.2642	70.339	66.9492	67.5439	67.9245		23.3645	25.7143	84.375	60	69.8113	55.6522	63.1068	66.9643
	11	59.2593	99.0291	91.8367	84.6847	92	53.5714	87.963	66.0377	75.4237	72.8814	71.9298	76.4151			19.0476	95.8333	61.6	79.2453	64.3478	69.9029	73.2143
	12	63.8889	105.825	95.9184	92.7928	103	56.25	89.8148	72.6415	79.661	80.5085	81.5789	83.0189			13.3333	104.167	65.6	82.0755	71.3043	76.699	83.9286
	13	66.6667	110.68	103.061	101.802	115	61.6071	99.0741	77.3585	83.0508	85.5932	87.7193	93.3962				111.458	71.2	87.7358	79.1304	85.4369	91.0714
	14	71.2963	112.621	107.143	109.91	120	63.3929	100.926	84.9057	86.4407	87.2881	90.3509	97.1698				115.625	72.8	89.6226	82.6087	90.2913	93.75
	15	76.8519	117.476	111.224	107.207	124	70.5357	104.63	92.4528	91.5254	89.8305	93.8596	100.943				122.917	76	95.283	86.9565	95.1456	98.2143
	16	75.9259	119.417	112.245	108.108	125	69.6429	110.185	95.283	93.2203	94.0678	97.3684	103.774				127.083	77.6	100	90.4348	100.971	100.893
	17	80.5556	124.272	120.408	124.324	133	75	113.889	101.887	100	96.6102	101.754	104.717				131.25	80.8	104.717	94.7826	106.796	104.464
	18	81.4815	130.097	125.51	122.523	142	84.8214	114.815	104.717	101.695	97.4576	102.632	106.604				136.458	83.2	107.547	98.2609	108.738	102.679
	19	84.2593	131.068	127.551	127.928	146	92.8571	119.444	111.321	105.932	100.847	106.14	113.208				144.792	89.6	114.151	103.478	114.563	109.821
	20	87.037	133.981	130.612	127.027	149	94.6429	129.63	114.151	107.627	105.932	110.526	118.868				153.125	92	118.868	109.565	120.388	113.393
	21	90.7407	134.951	134.694	126.126	153	97.3214	125	137.736	110.169	107.627	113.158	122.642				158.333	93.6	118.868	113.043	123.301	115.179
	22	93.5185	134.951	136.735	124.324	154	98.2143	128.704	122.642	113.559	111.017	113.158	125.472				161.458	94.4	125.472	114.783	134.951	114.286
	23	99.0741	136.893	140.816	126.126	156	100	131.481	127.358	114.407	112.712	114.035	128.302				163.542	95.2	129.245	119.13	139.806	118.75
	24	100.926	138.835	145.918	124.324	153	100	133.333	129.245	116.949	111.864	116.667	126.415				163.542	98.4	132.075	121.739	141.748	116.964
	25	107.407	140.777	143.878	126.126	161	98.2143	133.333	126.415	117.797	118.644	118.421	125.472				170.833	104.8	126.415	118.261	145.631	129.464
	26	108.333	136.893	151.02	125.225	163	102.679	135.185	129.245	115.254	116.949	115.789	123.585				175	100.8	126.415	119.13	149.515	126.786
	27	111.111	133.01	151.02	125.225	162	100.893	133.333	128.302	116.949	117.797	114.035	121.698				168.75	104	133.019	126.087	154.369	126.786
	28	114.815	133.981	150	126.126	160	103.571	133.333	127.358	119.492	115.254	114.035	124.528				170.833	109.6	131.132	122.609	153.398	125

## Sheet: Clinical Scores
	Day Post-infection	hTfR1+/+						IFN-α/βR-/-						IFN-α/βγR-/-						hTfR1+/+; IFN-α/βR-/-						hTfR1+/+; IFN-α/βγR-/-						Sham-infected
	0	0	0	0				0	0	0	0	0	0	0	0	0	0	0	0	0	0	0	0	0	0	0	0	0	0	0	0	0	0	0
	1	0	0	0				0	0	0	0	0	0	0	0	0	0	0	0	0	0	0	0	0	0	0	0	0	0	0	0	0	0	0
	2	0	0	0				0	0	0	0	0	0	0	0	0	0	0	0	0	0	0	0	0	0	0	0	0	0	0	0	0	0	0
	3	0	0	0				0	0	0	0	0	0	0	0	0	0	0	0	0	0	0	0	0	0	0	0	0	0	0	0	0	0	0
	4	0	0	0				0	0	0	0	0	0	0	0	0	0	0	0	0	0	0	0	0	0	0	0	0	0	0	0	0	0	0
	5	0	0	0				0	0	0	0	0	0	0	0	0	0	0	0	0	0	0	0	0	0	0	0	0	0	0	0	0	0	0
	6	0	0	0				0	0	0	0	0	0	0	0	0	0	0	0	0	0	0	0	0	0	0	0	0	0	0	0	0	0	0
	7	1	0	0				0	0	0	0	0	0	0	0	0	0	0	0	0	0	0	0	0	0	0	0	0	0	0	0	0	0	0
	8	4	1	1				0	0	0	0	0	0	0	0	0	0	0	0	0	0	0	0	0	0	0	0	0	0	0	0	0	0	0
	9	4	2	2				0	0	0	0	0	0	0	0	0	0	0	0	0	0	0	0	0	0	0	0	0	0	0	0	0	0	0
	10		5	3				0	0	0	0	0	0	0	0	0	0	0	0	0	0	0	0	0	0	0	0	0	0	0	0	0	0	0
	11			5				0	0	0	0	0	0	0	0	0	0	0	0	0	0	0	0	0	0	0	0	0	0	0	0	0	0	0
	12			5				0	0	0	0	0	0	0	0	0	0	0	0	0	0	0	0	0	0	0	0	0	0	0	0	0	0	0
	13							0	0	0	0	0	0	0	0	0	0	0	0	0	0	0	0	0	0	0	0	0	0	0	0	0	0	0
	14							0	0	0	0	0	0	0	0	0	0	0	0	0	0	0	0	0	0	0	0	0	0	0	0	0	0	0
	15							0	0	0	0	0	0	0	0	0	0	0	0	0	0	0	0	0	0	0	0	0	0	0	0	0	0	0
	16							0	0	0	0	0	0	0	0	0	0	0	0	0	0	0	0	0	0	0	0	0	0	0	0	0	0	0
	17							0	0	0	0	0	0	0	0	0	0	0	0	0	0	0	0	0	0	0	0	0	0	0	0	0	0	0
	18							0	0	0	0	0	0	0	0	0	0	0	0	0	0	0	0	0	0	0	0	0	0	0	0	0	0	0
	19							0	0	0	0	0	0	0	0	0	0	0	0	0	0	0	0	0	0	0	0	0	0	0	0	0	0	0
	20							0	0	0	0	0	0	0	0	0	0	0	0	0	0	0	0	0	0	0	0	0	0	0	0	0	0	0
	21							0	0	0	0	0	0	0	0	0	0	0	0	0	0	0	0	0	0	0	0	0	0	0	0	0	0	0
	22							0	0	0	0	0	0	0	0	0	0	0	0	0	0	0	0	0	0	0	0	0	0	0	0	0	0	0
	23							0	0	0	0	0	0	0	0	0	0	0	0	0	0	0	0	0	0	0	0	0	0	0	0	0	0	0
	24							0	0	0	0	0	0	0	0	0	0	0	0	0	0	0	0	0	0	0	0	0	0	0	0	0	0	0
	25							0	0	0	0	0	0	0	0	0	0	0	0	0	0	0	0	0	0	0	0	0	0	0	0	0	0	0
	26							0	0	0	0	0	0	0	0	0	0	0	0	0	0	0	0	0	0	0	0	0	0	0	0	0	0	0
	27							0	0	0	0	0	0	0	0	0	0	0	0	0	0	0	0	0	0	0	0	0	0	0	0	0	0	0
	28							0	0	0	0	0	0	0	0	0	0	0	0	0	0	0	0	0	0	0	0	0	0	0	0	0	0	0

## Sheet: Titers
			Wild-Type			Type I IFN Receptor-/-			Type I and II IFN Receptor-/-			hTfR1+/+× Type I IFN Receptor-/-			hTfR1+/+× Type I and II IFN Receptor-/-
	Liver		2.3	2.3	2.3	2.3	2.3	2.3	4.27	4.27	4.93	4.93	4.6	5.6	5.6	5.1	4.6
	Spleen		2.3	2.3	2.3	2.3	2.3	2.3	4.93	4.93	5.6	4.1	4.6	4.6	4.27	4.6	4.1
	Brain		2.3	2.3	2.3	4.93	6.6	5.6	4.93	6.6	6.6	4.1	5.27	4.1	6.6	6.27	6.27
	Kidney		2.3	2.3	2.3	2.3	2.3	2.3	4.6	4.6	4.6	4.6	3.93	4.6	4.93	4.9	4.93
	Lung		2.3	2.3	2.3	2.3	2.3	2.3	3.6	3.1	3.27	4.6	4.6	4.1	4.6	4.27	4.27
	Heart		2.3	2.3	2.3	2.3	2.3	2.3	3.6	4.93	5.1	4.1	3.6	4.1	4.1	4.93	4.27
