# Supplementary material for: Type I interferon underlies severe disease associated with Junín virus infection in mice
Source: eLife. 2020 May 26;9:e55352. doi: 10.7554/eLife.55352 (PMC7297529; doi:10.7554/eLife.55352)
Supplement: Figure 8—source data 1. [file elife-55352-fig8-data1.xlsx]

## Sheet: Survival
		Sham-infected	Single Tx	One-Week Tx	Two-Week Tx	Placebo Tx
	28	1	1	1	1			succumbed=0
	28	1	1	1	1			survived=1
	28	1	1	1	1
	28		1
	14			0
	9					0
	11					0
	11					0
	11					0

## Sheet: Weights
		Single-Treatment				One Week Treatment				Two Week Treatment				Mock-Treatment				Sham-Infected
	0	0	0	0	0	0	0	0	0	0	0	0		0	0	0	0	0	0	0
	1	-1.17647	1.38889	2.0202	0	5.55556	4.5977	1.86916	7.92079	-4.16667	5.37634	11.1111		7.35294	10.8108	2.7027	8.19672	7.31707	8.33333	2.66667
	2	14.1176	12.5	15.1515	2.73973	13.3333	16.092	10.2804	15.8416	9.72222	17.2043	25		13.2353	10.8108	13.5135	18.0328	14.6341	16.6667	8
	3	18.8235	19.4444	16.1616	5.47945	18.8889	17.2414	16.8224	17.8218	12.5	20.4301	29.1667		16.1765	17.5676	17.5676	19.6721	25.6098	23.8095	12
	4	23.5294	25	19.1919	8.21918	23.3333	20.6897	23.3645	26.7327	20.8333	26.8817	30.5556		20.5882	27.027	29.7297	31.1475	39.0244	32.1429	20
	5	20	33.3333	23.2323	17.8082	30	28.7356	28.972	31.6832	26.3889	33.3333	40.2778		27.9412	39.1892	43.2432	39.3443	50	38.0952	33.3333
	6	29.4118	44.4444	29.2929	27.3973	35.5556	35.6322	35.514	42.5743	36.1111	43.0108	50		39.7059	50	54.0541	54.0984	56.0976	41.6667	42.6667
	7	29.4118	56.9444	33.3333	35.6164	33.3333	37.931	36.4486	37.6238	37.5	48.3871	55.5556		52.9412	52.7027	62.1622	62.2951	69.5122	48.8095	52
	8	36.4706	58.3333	33.3333	43.8356	35.5556	34.4828	38.3178	35.6436	37.5	47.3118	54.1667		58.8235	58.1081	54.0541	57.377	79.2683	52.381	64
	9	37.6471	65.2778	34.3434	46.5753	33.3333	32.1839	38.3178	33.6634	40.2778	49.4624	59.7222			51.3514	45.9459	42.623	89.0244	55.9524	77.3333
	10	42.3529	73.6111	34.3434	53.4247	35.5556	33.3333	42.0561	31.6832	41.6667	52.6882	61.1111			45.9459	39.1892	29.5082	101.22	61.9048	85.3333
	11	48.2353	84.7222	39.3939	67.1233	40	39.0805	48.5981	34.6535	51.3889	62.3656	68.0556						114.634	69.0476	100
	12	51.7647	101.389	44.4444	76.7123	45.5556	42.5287	49.5327	34.6535	62.5	72.043	87.5						129.268	75	113.333
	13	49.4118	106.944	42.4242	82.1918	53.3333	52.8736	53.271	30.6931	65.2778	72.043	87.5						129.268	75	125.333
	14	55.2941	115.278	45.4545	83.5616	54.4444	52.8736	59.8131		66.6667	80.6452	97.2222						131.707	78.5714	136
	15	58.8235	127.778	51.5152	91.7808	50	45.977	60.7477		76.3889	83.871	101.389						137.805	84.5238	142.667
	16	57.6471	134.722	53.5354	98.6301	37.7778	41.3793	68.2243		80.5556	89.2473	111.111						139.024	79.7619	150.667
	17	50.5882	136.111	52.5253	108.219	44.4444	45.977	73.8318		88.8889	97.8495	108.333						141.463	86.9048	164
	18	50.5882	145.833	57.5758	115.068	46.6667	43.6782	79.4393		94.4444	100	122.222						141.463	91.6667	164
	19	50.5882	154.167	60.6061	121.918	53.3333	49.4253	84.1121		102.778	107.527	136.111						146.341	92.8571	166.667
	20	50.5882	162.5	61.6162	128.767	50	50.5747	80.3738		102.778	106.452	137.5						142.683	95.2381	166.667
	21	49.4118	162.5	60.6061	126.027	54.4444	49.4253	83.1776		111.111	107.527	143.056						142.683	97.619	162.667
	22	65.8824	180.556	70.7071	142.466	64.4444	60.9195	94.3925		127.778	111.828	156.944						151.22	102.381	169.333
	23	64.7059	179.167	71.7172	143.836	64.4444	60.9195	91.5888		133.333	107.527	161.111						147.561	96.4286	169.333
	24	68.2353	180.556	74.7475	149.315	65.5556	66.6667	98.1308		136.111	106.452	158.333						150	101.19	172
	25	71.7647	181.944	76.7677	147.945	71.1111	62.069	96.2617		140.278	106.452	155.556						152.439	105.952	172
	26	75.2941	181.944	76.7677	152.055	73.3333	77.0115	100.935		145.833	110.753	161.111						157.317	101.19	181.333
	27	81.1765	188.889	83.8384	160.274	80	86.2069	107.477		163.889	115.054	172.222						157.317	100	180
	28	81.1765	188.889	89.899	165.753	84.4444	88.5057	111.215		175	121.505	180.556						162.195	100	185.333
	29	84.7059	193.056	91.9192	171.233	88.8889	88.5057	112.15		176.389	120.43	176.389						160.976	97.619	185.333
	30	85.8824	195.833	100	184.932	92.2222	90.8046	110.28		177.778	126.882	175						164.634	100	189.333

## Sheet: Clinical Scores
		Single mAb Tx				One-week mAb Tx				Two-week mAb Tx				Two-week placebo Tx				Sham-infected
	0	0	0	0	0	0	0	0	0	0	0	0		0	0	0	0	0	0	0
	1	0	0	0	0	0	0	0	0	0	0	0		0	0	0	0	0	0	0
	2	0	0	0	0	0	0	0	0	0	0	0		0	0	0	0	0	0	0
	3	0	0	0	0	0	0	0	0	0	0	0		0	0	0	0	0	0	0
	4	0	0	0	0	0	0	0	0	0	0	0		0	0	0	0	0	0	0
	5	0	0	0	0	0	0	0	0	0	0	0		0	0	0	0	0	0	0
	6	0	0	0	0	0	0	0	0	0	0	0		0	0	0	0	0	0	0
	7	0	0	0	0	0	0	0	0	0	0	0		0	0	0	0	0	0	0
	8	0	0	0	0	0	0	0	0	0	0	0		1	0	1	1	0	0	0
	9	0	0	0	0	0	0	0	0	0	0	0			3	4	3	0	0	0
	10	0	0	0	0	0	0	0	0	0	0	0			5	5	4	0	0	0
	11	0	0	0	0	0	0	0	0	0	0	0						0	0	0
	12	0	0	0	0	0	0	0	0	0	0	0						0	0	0
	13	0	0	0	0	0	0	0	0	0	0	0						0	0	0
	14	0	0	0	0	0	0	0	0	0	0	0						0	0	0
	15	0	0	0	0	0	0	0	0	0	0	0						0	0	0
	16	0	0	0	0	0	0	0	0	0	0	0						0	0	0
	17	0	0	0	0	0	0	0	0	0	0	0						0	0	0
	18	0	0	0	0	0	0	0	0	0	0	0						0	0	0
	19	0	0	0	0	0	0	0	0	0	0	0						0	0	0
	20	0	0	0	0	0	0	0	0	0	0	0						0	0	0
	21	0	0	0	0	0	0	0	0	0	0	0						0	0	0
	22	0	0	0	0	0	0	0	0	0	0	0						0	0	0
	23	0	0	0	0	0	0	0	0	0	0	0						0	0	0
	24	0	0	0	0	0	0	0	0	0	0	0						0	0	0
	25	0	0	0	0	0	0	0	0	0	0	0						0	0	0
	26	0	0	0	0	0	0	0	0	0	0	0						0	0	0
	27	0	0	0	0	0	0	0	0	0	0	0						0	0	0
	28	0	0	0	0	0	0	0	0	0	0	0						0	0	0

## Sheet: Titers
		Single-Treatment				One Week Treatment				Two Week Treatment
		2.3	2.3	5.3	2.3	2.3	5.8	2.3		5.63	2.3	2.3
		5.8	6.3	6.8	5.3	6.97	6.3	6.8		6.3	4.8	5.63
		2.3	2.3	2.3	2.3	2.3	5.3	2.3		6.3	2.3	2.3
		2.3	5.3	2.3	2.3	2.3	2.3	2.3		5.63	2.3	2.3
